# Supplementary material for: Encapsulation and Characterization of Nanoemulsions Based on an Anti-oxidative Polymeric Amphiphile for Topical Apigenin Delivery
Source: PubMed Central journal article supplement (PMC8037426; doi:10.3390/polym13071016), 2021-03-25
Supplement: polymers-13-01016-s001.pdf [file polymers-13-01016-s001.pdf]

## Supporting Information

### **Encapsulation and characterization of nanoemulsions based on an anti-oxidative polymeric amphiphile for topical apigenin delivery**

Tzung-Han Chou<sup>1,\*</sup>, Daniel Setiyo Nugroho<sup>1</sup>, Jia-Yaw Chang<sup>2</sup>, Yu-Shen Cheng<sup>1</sup>, Chia-Hua Liang<sup>3</sup>  
and Ming-Jay Deng<sup>4</sup>

<sup>1</sup> Department of Chemical and Materials Engineering, National Yunlin University of Science and Technology, Yunlin 64022, Taiwan; chouth@yuntech.edu.tw

<sup>2</sup> Department of Chemical Engineering, National Taiwan University of Science and Technology, Taipei 10607, Taiwan; jychang@mail.ntust.edu.tw

<sup>3</sup> Department of Cosmetic Science, Chia Nan University of Pharmacy and Science, Tainan 717, Taiwan; tinna\_ling@mail.cnu.edu.tw

<sup>4</sup> Department of Applied Chemistry, Providence University, 200 Taiwan Boulevard, Sec. 7, Taichung, 43301, Taiwan; dengmj1020@pu.edu.tw

\*Correspondence: Author: Tel. (+) 886-5-5342601 ext. 4625, Fax. (+) 886-5-5312071. E-mail: chouth@yuntech.edu.tw

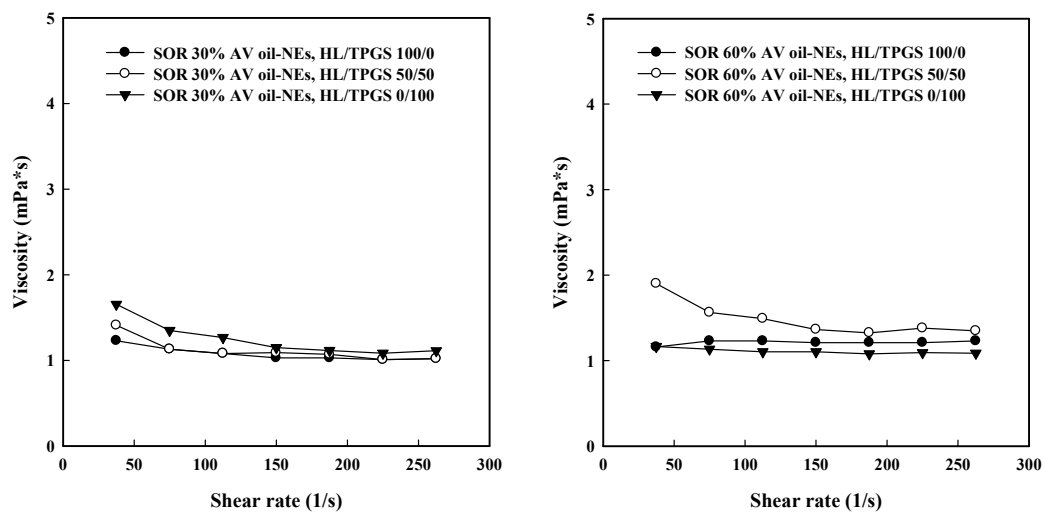

**Figure S1.** The viscosity of fresh AV oil-NEs with SOR 30 and 60%, oil content 1%, and different surfactant ratios of HL to TPGS as a function of the shear rate at 25°C.

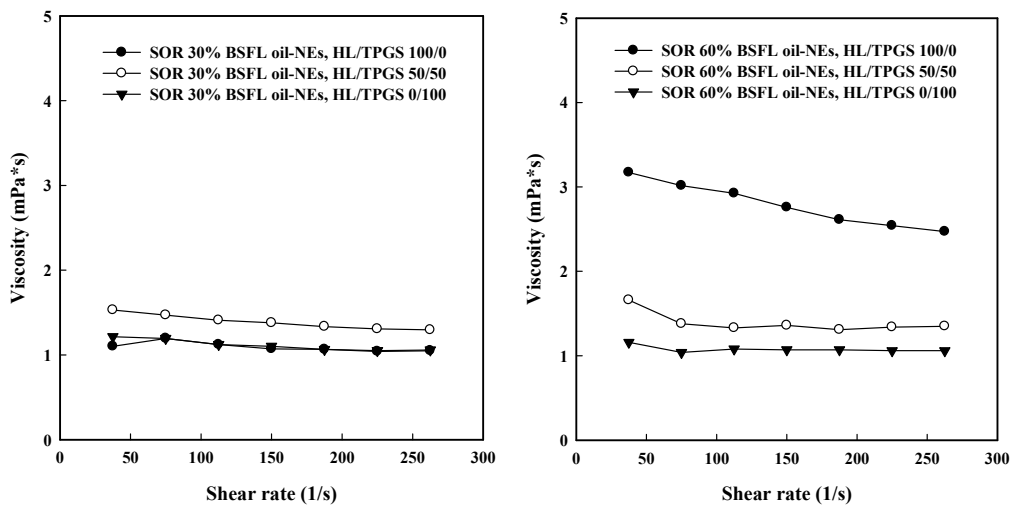

**Figure. S2.** The viscosity of fresh BSFL oil-NEs with SOR 30 and 60%, oil content 1%, and different surfactant ratios of HL to TPGS as a function of the shear rate at 25°C.
